# Supplementary material for: An unusual phase sequence of iso liq-blue phase-smectic A observed for novel binaphthyl mesogenic derivatives
Source: Royal Society of Chemistry journal article supplement (doi:10.1039/b410931g), 2004-12-24
Supplement: b410931g.pdf [file b410931g.pdf]

## Electronic Supplementary Information

ESI. 1 Analytical data for compounds **(S)-9**, **(R)-6**, **(R)-7**, **(R)-8**, **(R)-10**, **(R)-11** and **(R)-12**.

### **(S)-2,2'-Bis{6-[4-(2-(2-fluoro-4-butyloxyphenyl)pyrimidine-5-yl)phenoxy]nonoxy}-1,1'-binaphthyl, (S)-9**

**(S)-9** was prepared from *(S)*-2,2'-dihydroxy-1,1'-binaphthyl in a similar method to that described for **(R)-9**. <sup>1</sup>H NMR (270MHz, solvent CDCl<sub>3</sub>, standard TMS) δ<sub>H</sub>/ppm: 9.00(s, 4H, Ar-H), 8.12(t, 2H, Ar-H, J=8.9Hz), 7.91(d, 2H, Ar-H, J=8.9Hz), 7.83(d, 2H, Ar-H, J=8.1Hz), 7.54(d, 4H, Ar-H, J=8.5Hz), 7.39(d, 2H, Ar-H, J=8.9Hz), 7.32-7.16(m, 6H, Ar-H), 7.02(d, 4H, Ar-H, J=8.9Hz), 6.83-6.71(m, 4H, Ar-H), 4.03(t, 4H, Ar-OCH<sub>2</sub>-, J=6.6Hz), 4.00-3.84(m, 4H, -CH<sub>2</sub>O-), 4.00(t, 4H, Ar-OCH<sub>2</sub>-, J=6.5Hz), 1.85-0.89(m, 42H, aliphatic-H); IR (KBr) ν<sub>max</sub>/cm<sup>-1</sup>: 2933, 2855, 1620, 1439, 1430, 1248; Purity: 100%. Elemental Analysis: Found: C, 77.32; H, 6.90; N, 4.65. Calc. for C<sub>78</sub>H<sub>84</sub>F<sub>2</sub>N<sub>4</sub>O<sub>6</sub>: C, 77.26; H, 6.93; N, 4.62%.

### **(R)-2,2'-Bis{6-[4-(2-(2-fluoro-4-butyloxyphenyl)pyrimidine-5-yl)phenoxy]hexyloxy}-1,1'-binaphthyl, (R)-6**

**(R)-6** was prepared from *(R)*-2,2'-dihydroxy-1,1'-binaphthyl in a similar method to that described for **(R)-9**. <sup>1</sup>H NMR (270MHz, solvent CDCl<sub>3</sub>, standard TMS) δ<sub>H</sub>/ppm: 8.98(s, 4H, Ar-H), 8.10(t, 2H, Ar-H, J=8.9Hz), 7.90(d, 2H, Ar-H, J=8.9Hz), 7.83(d, 2H, Ar-H, J=8.1Hz), 7.53(d, 4H, Ar-H, J=8.9Hz), 7.40(d, 2H, Ar-H, J=8.9Hz), 7.32-7.13(m, 6H, Ar-H), 6.97(d, 4H, Ar-H, J=8.9Hz), 6.83-6.70(m, 4H, Ar-H), 4.02(t, 4H, Ar-OCH<sub>2</sub>-, J=6.5Hz), 4.00-3.86(m, 4H, -CH<sub>2</sub>O-), 3.80(t, 4H, Ar-OCH<sub>2</sub>-, J=6.6Hz), 1.85-0.89(m, 30H, aliphatic-H); IR (KBr) ν<sub>max</sub>/cm<sup>-1</sup>: 2936, 2870, 1619, 1438, 1428, 1247; Purity: 100%. Elemental Analysis: Found: C, 76.75; H, 6.33; N, 5.07. Calc. for C<sub>72</sub>H<sub>72</sub>F<sub>2</sub>N<sub>4</sub>O<sub>6</sub>: C, 76.64; H, 6.39; N, 4.97%.

### **(R)-2,2'-Bis{6-[4-(2-(2-fluoro-4-butyloxyphenyl)pyrimidine-5-yl)phenoxy]heptyloxy}-1,1'-binaphthyl, (R)-7**

**(R)-7** was prepared from *(R)*-2,2'-dihydroxy-1,1'-binaphthyl in a similar method to that described for **(R)-9**. <sup>1</sup>H NMR (270MHz, solvent CDCl<sub>3</sub>, standard TMS) δ<sub>H</sub>/ppm: 9.00(s,

4H, Ar-H), 8.12(t, 2H, Ar-H, J=8.9Hz), 7.91(d, 2H, Ar-H, J=8.9Hz), 7.83(d, 2H, Ar-H, J=7.8Hz), 7.54(d, 4H, Ar-H, J=8.9Hz), 7.40(d, 2H, Ar-H, J=8.9Hz), 7.32-7.13(m, 6H, Ar-H), 7.01(d, 4H, Ar-H, J=8.6Hz), 6.83-6.70(m, 4H, Ar-H), 4.03(t, 4H, Ar-OCH<sub>2</sub>-, J=6.5Hz), 4.00-3.85(m, 4H, -CH<sub>2</sub>O-), 3.91(t, 4H, Ar-OCH<sub>2</sub>-, J=6.4Hz), 1.85-0.89(m, 34H, aliphatic-H); IR (KBr)  $\nu_{\max}/\text{cm}^{-1}$ : 2936, 2870, 1620, 1438, 1430, 1248; Purity: 100%. Elemental Analysis: Found: C, 76.76; H, 6.52; N, 4.89. Calc. for C<sub>74</sub>H<sub>76</sub>F<sub>2</sub>N<sub>4</sub>O<sub>6</sub>: C, 76.85; H, 6.58; N, 4.85%.

**(R)-2,2'-Bis{6-[4-(2-(2-fluoro-4-butyloxyphenyl)pyrimidine-5-yl)phenoxy]octyloxy}-1,1'-binaphthyl, (R)-8**

**(R)-8** was prepared from (R)-2,2'-dihydroxy-1,1'-binaphthyl in a similar method to that described for **(R)-9**. <sup>1</sup>H NMR (270MHz, solvent CDCl<sub>3</sub>, standard TMS)  $\delta_{\text{H}}/\text{ppm}$ : 9.01(s, 4H, Ar-H), 8.12(t, 2H, Ar-H, J=8.9Hz), 7.91(d, 2H, Ar-H, J=8.9Hz), 7.83(d, 2H, Ar-H, J=8.1Hz), 7.54(d, 4H, Ar-H, J=8.5Hz), 7.40(d, 2H, Ar-H, J=8.9Hz), 7.32-7.10(m, 6H, Ar-H), 7.03(d, 4H, Ar-H, J=8.6Hz), 6.84-6.71(m, 4H, Ar-H), 4.03(t, 4H, Ar-OCH<sub>2</sub>-, J=6.6Hz), 4.00-3.84(m, 4H, -CH<sub>2</sub>O-), 4.00(t, 4H, Ar-OCH<sub>2</sub>-, J=6.5Hz), 1.85-0.89(m, 38H, aliphatic-H); IR (KBr)  $\nu_{\max}/\text{cm}^{-1}$ : 2935, 2856, 1620, 1438, 1429, 1248; Purity: 100%. Elemental Analysis: Found: C, 77.14; H, 6.70; N, 4.82. Calc. for C<sub>76</sub>H<sub>80</sub>F<sub>2</sub>N<sub>4</sub>O<sub>6</sub>: C, 77.06; H, 6.76; N, 4.73%.

**(R)-2,2'-Bis{6-[4-(2-(2-fluoro-4-butyloxyphenyl)pyrimidine-5-yl)phenoxy]decyloxy}-1,1'-binaphthyl, (R)-10**

**(R)-10** was prepared from (R)-2,2'-dihydroxy-1,1'-binaphthyl in a similar method to that described for **(R)-9**. <sup>1</sup>H NMR (270MHz, solvent CDCl<sub>3</sub>, standard TMS)  $\delta_{\text{H}}/\text{ppm}$ : 9.01(s, 4H, Ar-H), 8.13(t, 2H, Ar-H, J=8.8Hz), 7.91(d, 2H, Ar-H, J=9.4Hz), 7.83(d, 2H, Ar-H, J=8.1Hz), 7.54(d, 4H, Ar-H, J=8.4Hz), 7.40(d, 2H, Ar-H, J=8.9Hz), 7.31-7.15(m, 6H, Ar-H), 7.04(d, 4H, Ar-H, J=8.6Hz), 6.86-6.71(m, 4H, Ar-H), 4.03(t, 4H, Ar-OCH<sub>2</sub>-, J=6.5Hz), 4.00-3.86(m, 4H, -CH<sub>2</sub>O-), 4.01(t, 4H, Ar-OCH<sub>2</sub>-, J=6.5Hz), 1.85-0.89(m, 46H, aliphatic-H); IR (KBr)  $\nu_{\max}/\text{cm}^{-1}$ : 2931, 2854, 1620, 1438, 1429, 1247; Purity: 100%. Elemental Analysis: Found: C, 77.78; H, 7.10; N, 4.47. Calc. for C<sub>80</sub>H<sub>88</sub>F<sub>2</sub>N<sub>4</sub>O<sub>6</sub>: C, 77.45; H, 7.10; N, 4.52%.

**(R)-2,2'-Bis{6-[4-(2-(2-fluoro-4-butyloxyphenyl)pyrimidine-5-yl)phenoxy]undecyloxy}-1,1'-binaphthyl, (R)-11**

(R)-11 was prepared from (R)-2,2'-dihydroxy-1,1'-binaphthyl in a similar method to that described for (R)-9. <sup>1</sup>H NMR (270MHz, solvent CDCl<sub>3</sub>, standard TMS) δ<sub>H</sub>/ppm: 9.01(s, 4H, Ar-H), 8.13(t, 2H, Ar-H, J=8.9Hz), 7.90(d, 2H, Ar-H, J=8.9Hz), 7.83(d, 2H, Ar-H, J=7.8Hz), 7.54(d, 4H, Ar-H, J=8.9Hz), 7.39(d, 2H, Ar-H, J=8.9Hz), 7.31-7.15(m, 6H, Ar-H), 7.03(d, 4H, Ar-H, J=8.9Hz), 6.84-6.71(m, 4H, Ar-H), 4.03(t, 4H, Ar-OCH<sub>2</sub>-, J=6.5Hz), 4.00-3.86(m, 4H, -CH<sub>2</sub>O-), 4.01(t, 4H, Ar-OCH<sub>2</sub>-, J=6.6Hz), 1.85-0.89(m, 50H, aliphatic-H); IR (KBr) ν<sub>max</sub>/cm<sup>-1</sup>: 2926, 2853, 1620, 1439, 1429, 1247; Purity: 100% Elemental Analysis: Found: C, 77.63; H, 7.24; N, 4.47. Calc. for C<sub>82</sub>H<sub>92</sub>F<sub>2</sub>N<sub>4</sub>O<sub>6</sub>: C, 77.63; H, 7.25; N, 4.42%

**(R)-2,2'-Bis{6-[4-(2-(2-fluoro-4-butyloxyphenyl)pyrimidine-5-yl)phenoxy]dodecyloxy}-1,1'-binaphthyl, (R)-12**

(R)-12 was prepared from (R)-2,2'-dihydroxy-1,1'-binaphthyl in a similar method to that described for (R)-9. <sup>1</sup>H NMR (270MHz, solvent CDCl<sub>3</sub>, standard TMS) δ<sub>H</sub>/ppm: 9.02(s, 4H, Ar-H), 8.13(t, 2H, Ar-H, J=8.9Hz), 7.90(d, 2H, Ar-H, J=9.2Hz), 7.83(d, 2H, Ar-H, J=8.1Hz), 7.53(d, 4H, Ar-H, J=8.9Hz), 7.39(d, 2H, Ar-H, J=8.9Hz), 7.31-7.15(m, 6H, Ar-H), 7.03(d, 4H, Ar-H, J=8.9Hz), 6.84-6.71(m, 4H, Ar-H), 4.03(t, 4H, Ar-OCH<sub>2</sub>-, J=6.5Hz), 4.00-3.86(m, 4H, -CH<sub>2</sub>O-), 4.02(t, 4H, Ar-OCH<sub>2</sub>-, J=6.6Hz), 1.85-0.89(m, 54H, aliphatic-H ); IR(KBr) ν<sub>max</sub>/cm<sup>-1</sup>: 2924, 2852, 1620, 1439, 1429, 1247; Purity:100%. Elemental Analysis: Found: C, 77.66; H, 7.29; N, 4.59. Calc. for C<sub>84</sub>H<sub>96</sub>F<sub>2</sub>N<sub>4</sub>O<sub>6</sub>: C, 77.80; H, 7.41; N, 4.32%.

**(R)-9**

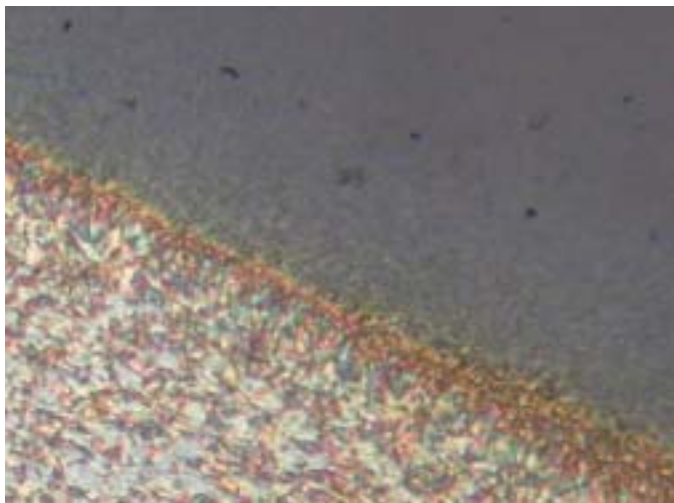

**(R)-10**

ESI. 2 Photomicrograph of a contact region between compounds **(R)-9** and **(R)-10** at 118.5 °C.

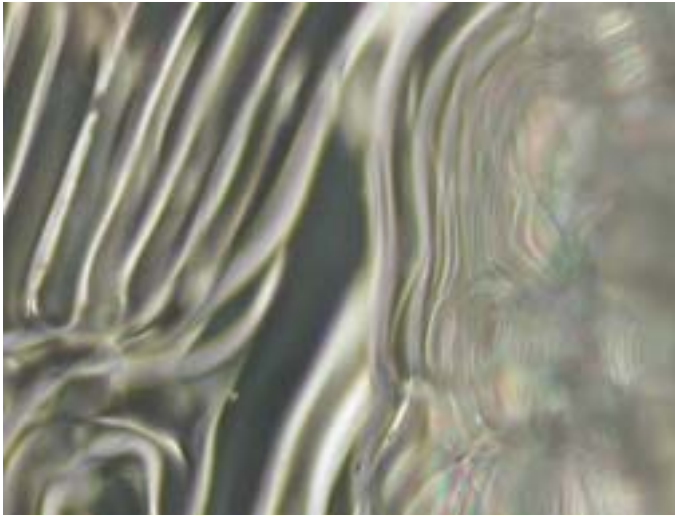

**(R)-9**

**(R)-10**

ESI. 3 Photomicrograph of a contact region between mixtures of achiral host material, 5-octyl-2-(4-hexyloxyphenyl)pyrimidine, and 5 wt% of each chiral compound, i.e. compound **(R)-9** (left-hand side) and compound **(R)-10** ( right-hand side) at 63.5 °C in the N\* phase.
